# Supplementary material for: D–A–D–π–D–A–D type diketopyrrolopyrrole based small molecule electron donors for bulk heterojunction organic solar cells
Source: Royal Society of Chemistry journal article supplement (doi:10.1039/c6cp02700h), 2016-01-01
Supplement: c6cp02700h1.pdf [file c6cp02700h1.pdf]

## **D-A-D- $\pi$ -D-A-D Type Diketopyrrolopyrrole Based Small Molecule Electron Donor for Bulk Heterojunction Organic Solar Cell**

Yuvraj Patil<sup>a</sup>, Rajneesh Misra<sup>a\*</sup>, Abhishek Sharma<sup>b</sup> and Ganesh D. Sharma<sup>c\*</sup>

<sup>a</sup>Department of Chemistry

Indian Institute of Technology, Indore (MP) 452020, India

<sup>b</sup>Department of Electronics and communication Engineering, The LNM Institute of Information Technology (Deemed University), Jamdoli, Jaipur (Raj.), 302031, India

<sup>c</sup>Department of Physics, The LNM Institute of Information Technology (Deemed University), Jamdoli, Jaipur (Raj.), 302031, India

|                                                            |                 |
|------------------------------------------------------------|-----------------|
| <b>Table of Contents.....</b>                              | <b>Page No.</b> |
| <b>Scheme S1 Synthesis of DPP-DPP and DPPTDPP.....</b>     | <b>S2</b>       |
| <b>Experimental part.....</b>                              | <b>S3-S4</b>    |
| <b>Fig. S1 DSC curves of DPP-DPP and DPPTDPP.....</b>      | <b>S6</b>       |
| <b>Fig. S2 <sup>1</sup>H NMR spectrum of DPP-DPP.....</b>  | <b>S5</b>       |
| <b>Fig. S3 <sup>13</sup>C NMR spectrum of DPP-DPP.....</b> | <b>S6</b>       |
| <b>Fig. S4 Mass spectra of DPP-DPP .....</b>               | <b>S7</b>       |
| <b>Fig. S5 <sup>1</sup>H NMR spectrum of DPPTDPP.....</b>  | <b>S8</b>       |
| <b>Fig. S6 <sup>13</sup>C NMR spectrum of DPPTDPP.....</b> | <b>S9</b>       |
| <b>Fig. S7 Mass spectra of DPPTDPP.....</b>                | <b>S10</b>      |
| <b>DFT Calculation data.....</b>                           | <b>S10-S12</b>  |

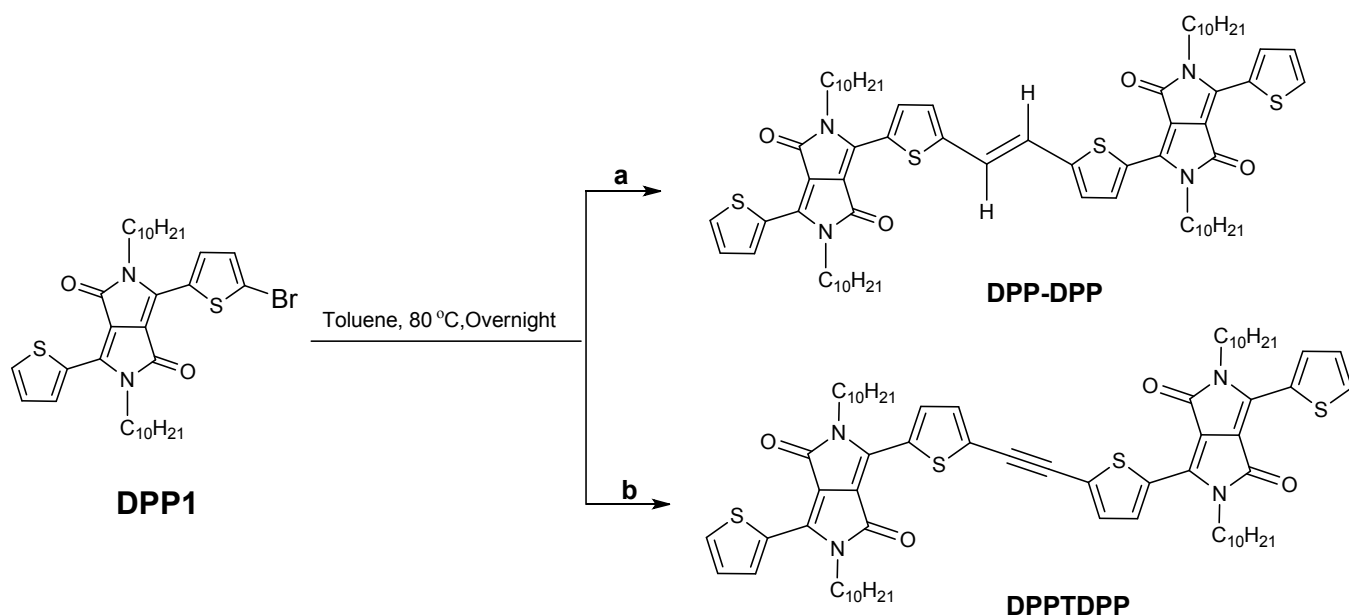

Reagents: **a** = bis(tributylstannyl)ethene , **b** = bis(tributylstannyl)acetylene

### Scheme S1. Synthesis of **DPP-DPP** and **DPPTDPP**

#### Experimental details

##### General Methods:

The chemicals were used as received unless otherwise indicated. All the moisture sensitive reactions were performed under argon by using standard Schlenk methods. The  $^1\text{H}$  and  $^{13}\text{C}$  NMR spectroscopic data were recorded at 400 and 100 MHz, respectively, by using  $\text{CDCl}_3$  as the solvent. The  $^1\text{H}$  NMR chemical shifts are reported in parts per million (ppm) relative to the residual proton signal of the solvent ( $\text{CHCl}_3$ ,  $\delta = 7.26$  ppm). The multiplicity of each resonance is described as s (singlet), d (doublet), t (triplet), q (quartet), and m (multiplet), and the coupling constants ( $J$ ) are given in Hertz (Hz). The chemical shifts of the  $^{13}\text{C}$  NMR spectra are reported relative to the solvent signal ( $\text{CDCl}_3$ ,  $\delta = 77.0$  ppm). The UV/Vis absorption spectra of the DPPs were recorded in chloroform with a UV/Vis spectrophotometer. The TGA analyses were performed with a thermal analysis system that was set to a heating rate of  $10\text{ }^\circ\text{C min}^{-1}$  under nitrogen. Cyclic voltammograms and differential voltammograms were recorded with an electrochemical analyzer that used glassy carbon as the working electrode, Pt wire as the counter electrode, and saturated  $\text{Ag}/\text{Ag}^+$  as the reference electrode.

## Device fabrication and characterization

The solution processed BHJ organic solar cells with ITO/PEDOT:PSS/ active layer/Al were prepared as follow: The indium tin oxide (ITO) coated glass substrates were cleaned ultrasonically and subsequently in aqueous detergent, deionized water, isopropyl alcohol and acetone and finally dried under ambient conditions. An aqueous solution of PEDOT:PSS (Heraeus, clevious PVP, Al 4083) was pin cast on the ITO substrates to obtain a film with thickness of about 40 nm and dried for 10 min at a temperature of 120° C. Mixture of **DPP-DPP** and PC<sub>71</sub>BM with weight ratios of 1:0.5, 1:1, 1:1.5, 1:2 and 1:2.5 in chloroform solution (concentration 14 mg/mL) were prepared and then spin cast onto the top of the PEDOT:PSS layer and dried at ambient conditions. Finally, the aluminum (Al) top electrode was thermally deposited on the top of active layer in a vacuum of 10<sup>-5</sup> Torr through a shadow mask of 20 mm<sup>2</sup>. For the two step annealing (TSA) treatment, first the active layer was thermally annealed at 120 °C for 10 min and cooled down to room temperature then the active layer was kept in the petri dish containing 100 µL THF for 20 min. All the devices were fabricated and tested under an ambient atmosphere without encapsulation. The hole-only and electron-only devices with ITO/PEODT:PSS/**DPP-DPP**:PC<sub>71</sub>BM/Au and ITO/Al/**DPP-DPP**:PC<sub>71</sub>BM/Al architectures were also fabricated in an analogous way, in order to measure the hole and electron mobility, respectively. The current-voltage (J-V) characteristics of the BHJ organic solar cells were measured using a computer controlled Keithley 2400 source meter in dark as well as under simulated AM1.5G illumination of 100 mW/cm<sup>2</sup>. A xenon light source coupled with optical filter was used to give the stimulated irradiance at the surface of the devices. The incident photon to current efficiency (IPCE) of the devices was measured illuminating the device through the light source and monochromator and the resulting current was measured using a Keithley electrometer under short circuit condition.

## Synthesis of DPP-DPP

In 100 ml round bottom flask monobromodiketopyrrolopyrrole **DPP1** (0.100 g, 0.15 mmol) and bis(tributylstannyl)ethene (0.040 ml, 0.075 mmol) were dissolved in dry toluene (20 ml). The reaction mixture was degassed with argon for 10 minutes and Pd(PPh<sub>3</sub>)<sub>4</sub> (0.035g, 0.030 mmol), was then added. The reaction mixture was stirred at 80 °C overnight. After completion of reaction, the reaction mixture was allowed to cool down to room temperature.

The solvent was removed under vacuo and the product was purified by repeated silica-column chromatography with hexane : dichloromethane (1:1) as an eluent in 65% yield.

$^1\text{H}$  NMR (400 MHz,  $\text{CDCl}_3$ ,  $\delta$  in ppm): 8.95 (2H, d,  $J = 4$  Hz), 8.90 (2H, d,  $J = 4$  Hz), 7.28 (4H, d,  $J = 4$  Hz), 7.23 (2H, s), 4.09 (8H, m), 2.17 (16H, s), 1.76 (8H, m), 1.26 (40H, s), 0.86 (12H, m);  $^{13}\text{C}$  NMR (100 MHz,  $\text{CDCl}_3$ ,  $\delta$  in ppm): 161.4, 161.2, 147.0, 139.9, 139.1, 136.3, 135.4, 130.8, 129.8, 129.3, 128.7, 128.5, 122.8, 108.6, 108.1, 42.34, 42.26, 31.9, 30.1, 30.0, 29.6, 29.5, 29.30, 29.27, 26.93, 26.91, 22.7, 14.1.

### Synthesis of DPPTDPP

In 100 ml round bottom flask monobromodiketopyrrolopyrrole **DPP1** (0.100 g, 0.15 mmol) and bis(tributylstannyl)acetylene (0.040 ml, 0.075 mmol) were dissolved in dry toluene (20 ml). The reaction mixture was degassed with argon for 10 minutes and  $\text{Pd}(\text{PPh}_3)_4$  (0.035g, 0.030 mmol), was then added. The reaction mixture was stirred at 80 °C overnight. After completion of reaction, the reaction mixture was allowed to cool down to room temperature. The solvent was removed under vacuo and the product was purified by repeated silica-column chromatography with hexane : dichloromethane (1:1) as an eluent in 58% yield.

$^1\text{H}$  NMR (400 MHz,  $\text{CDCl}_3$ ,  $\delta$  in ppm): 8.98 (2H, d,  $J = 4$  Hz), 8.92 (2H, d,  $J = 4$  Hz), 7.67 (2H, s), 7.45 (2H, s), 7.30 (2H, s), 4.08 (8H, m), 1.75 (8H, s), 1.44 (8H, m), 1.26 (46H, s), 0.87 (12H, m);  $^{13}\text{C}$  NMR (100 MHz,  $\text{CDCl}_3$ ,  $\delta$  in ppm): 161.3, 161.2, 140.6, 138.4, 135.8, 135.2, 135.1, 133.7, 132.2, 132.1, 131.6, 131.2, 13.4, 129.7, 128.7, 128.6, 128.4, 128.1, 127.9, 126.9, 109.0, 107.9, 90.5, 42.3, 31.9, 30.1, 29.9, 29.7, 29.5, 29.4, 29.3, 29.2, 26.2, 22.7, 14.1.

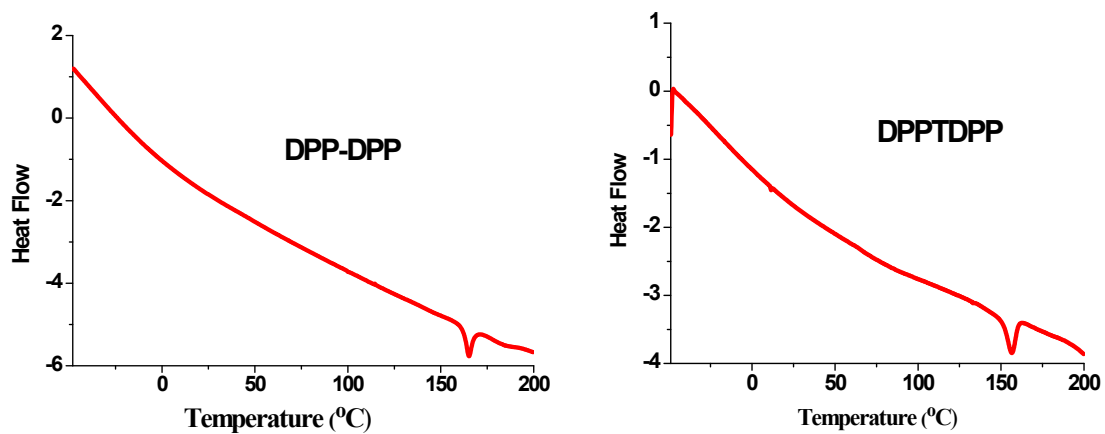

Fig.S1 DSC curves of **DPP-DPP** and **DPPTDPP** with a heating rate of 10 °C min<sup>-1</sup> under N<sub>2</sub>.

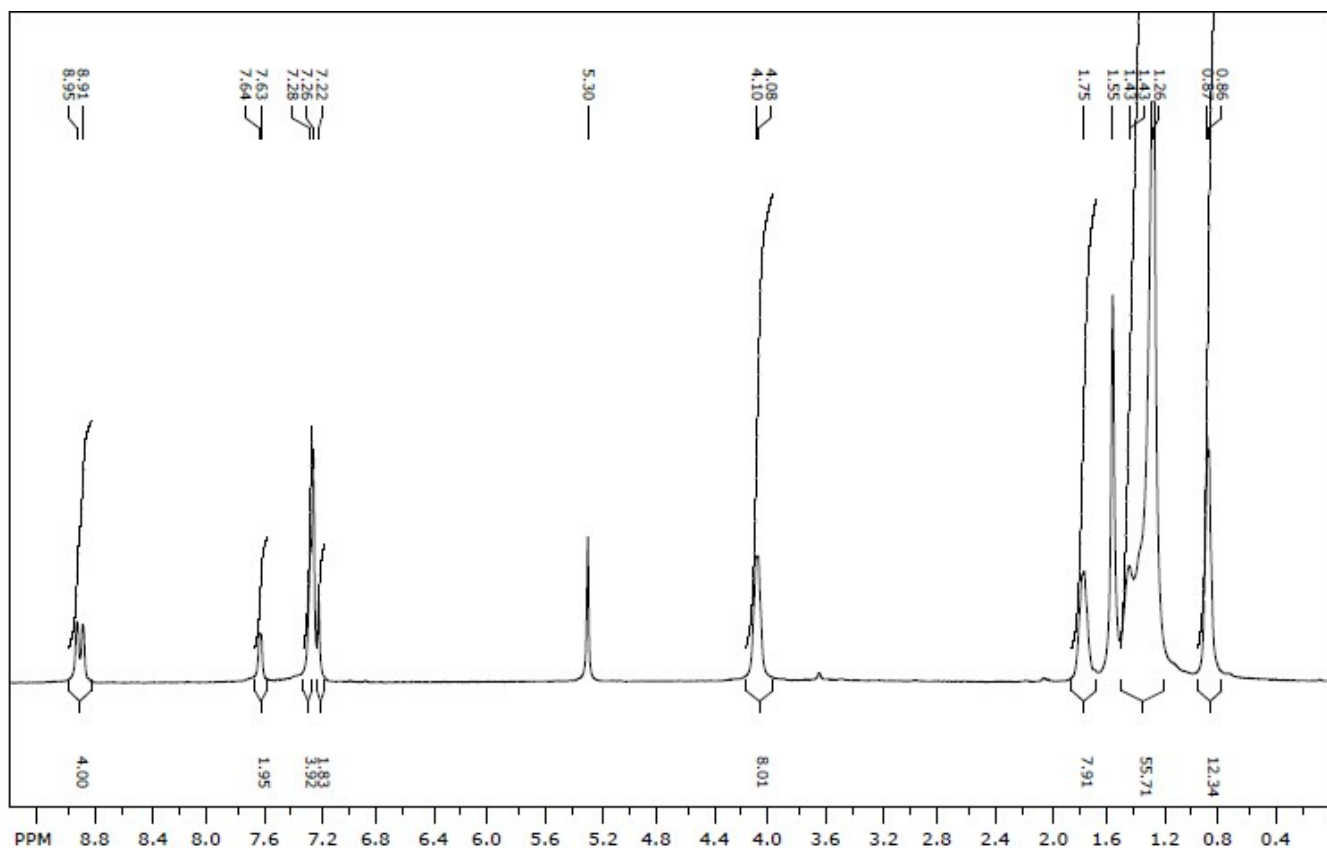

Fig. S2 <sup>1</sup>H NMR spectra of **DPP-DPP**

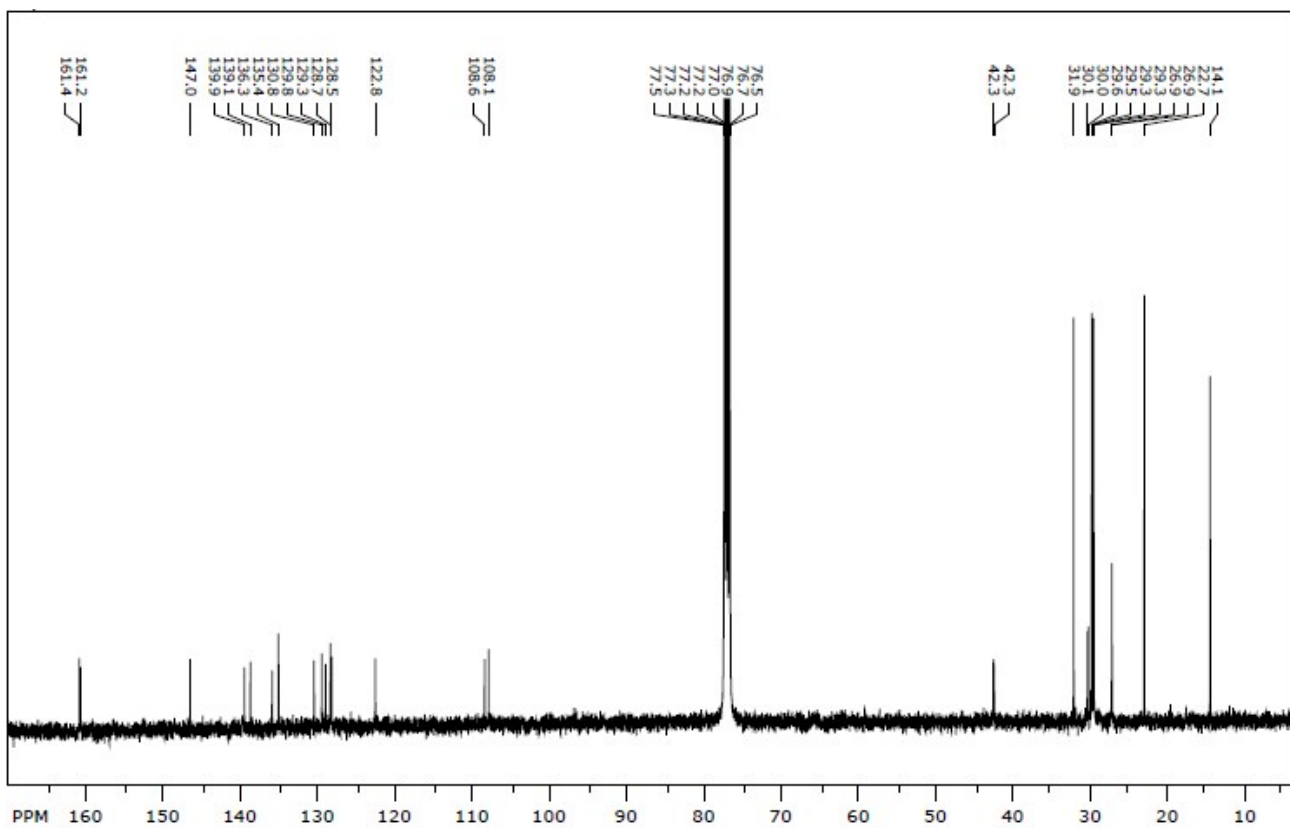

**Fig. S3**  $^{13}\text{C}$  NMR spectra of DPP-DPP

Applied Biosystems 4700 Proteomics Analyzer 72015

4700 Reflector Spec #1 MC=>NR(2.00)[BP = 1185.6, 234]

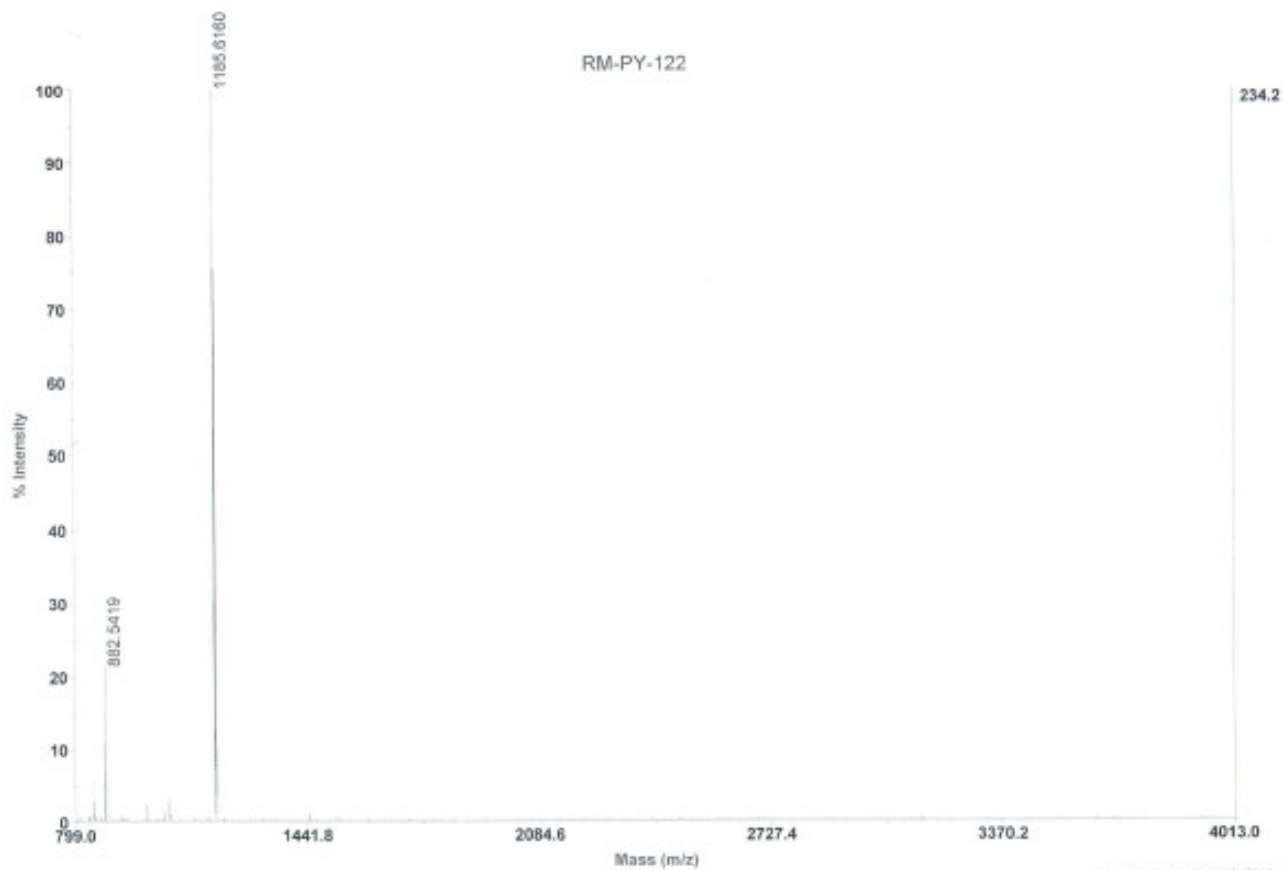

C:\BMALD\data\Export\2015\SA\F244-27042016-INTK11\_MS\_12d

Printed: 13:54, April 26, 2016

Fig. S4 Mass spectra of DPP-DPP

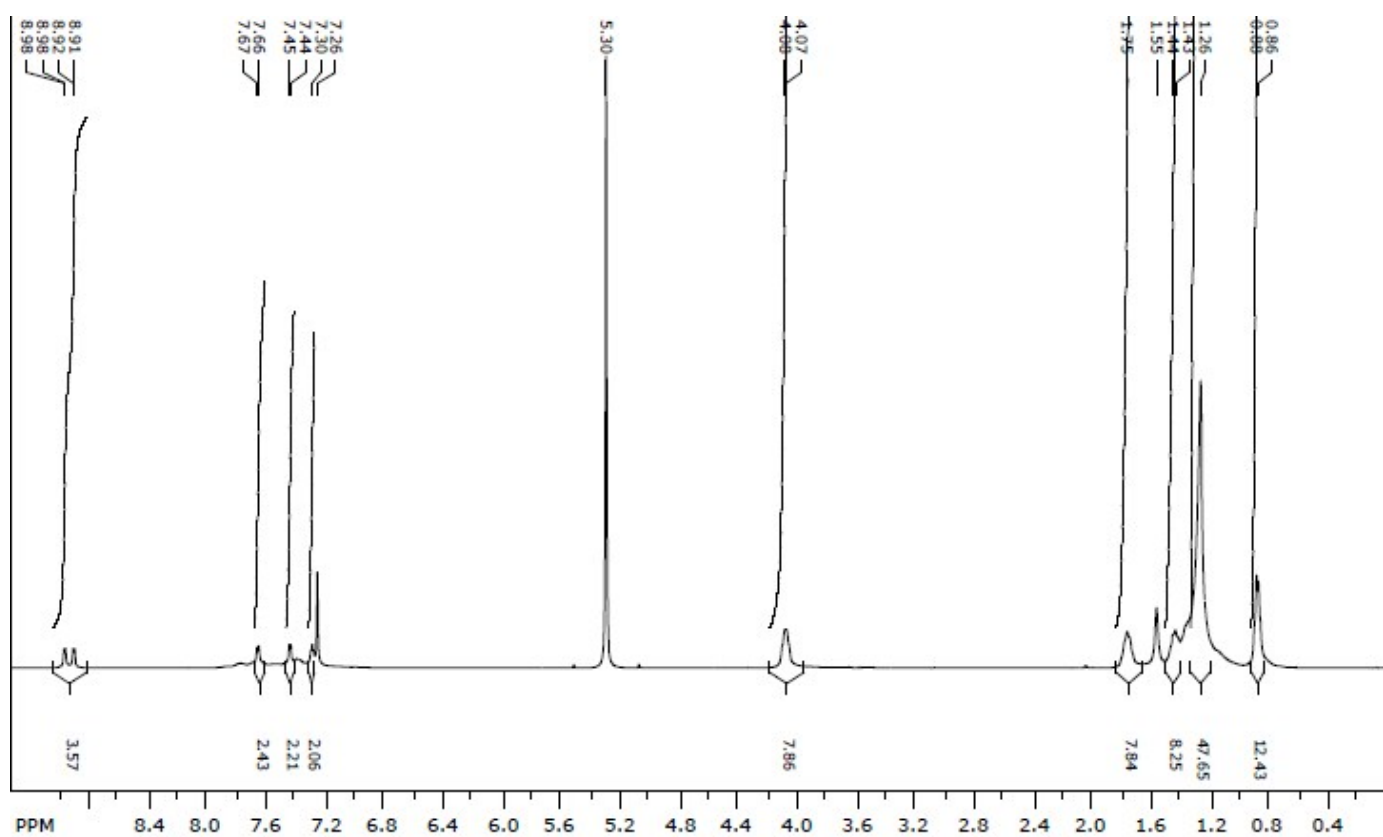

**Fig. S5** <sup>1</sup>H NMR spectra of DPPTDPP



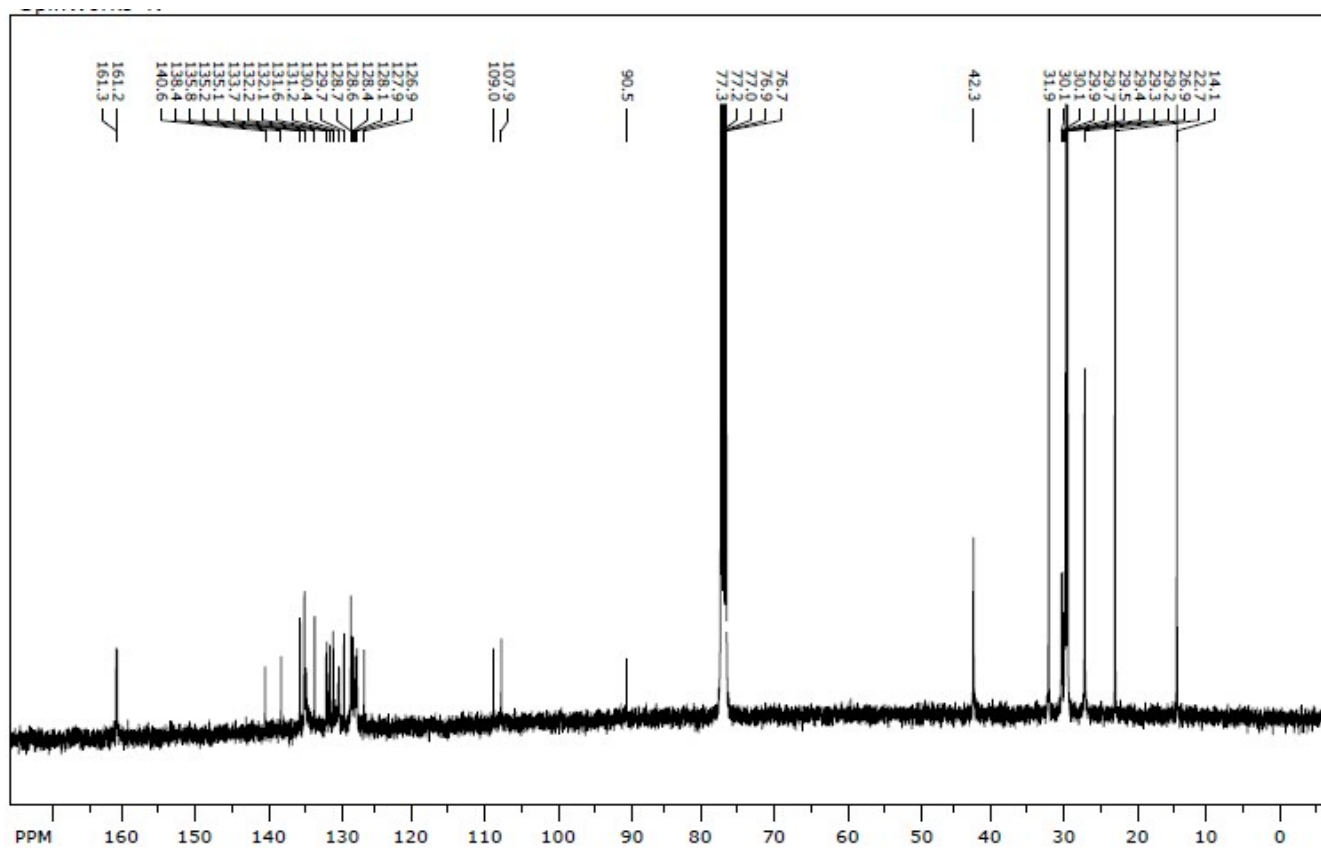

**Fig. S6**  $^{13}\text{C}$  NMR spectra of DPPTDPP

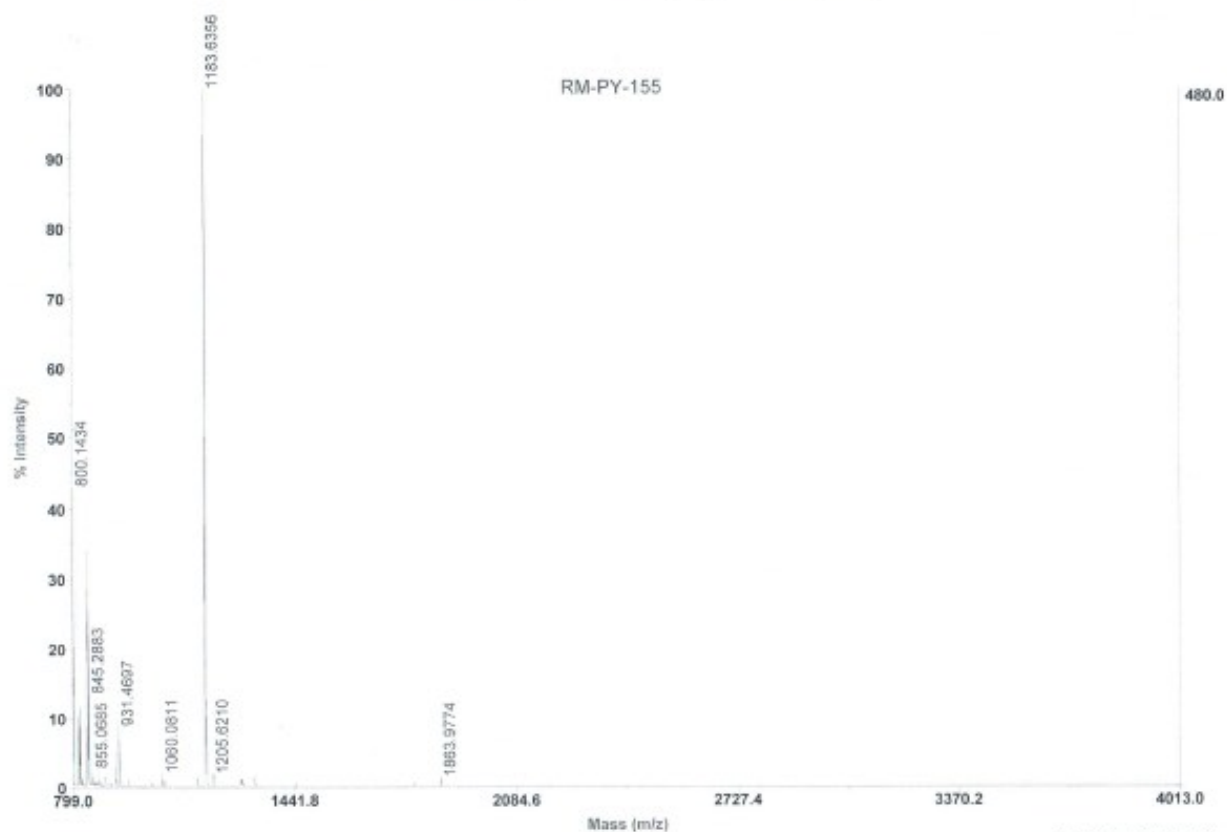

C:\ARMALD\data\Export\2016\SAIF\244-27042016-INTK14\_MS (2)

Printed: 13:55, April 28, 2016

**Fig. S7** Mass spectra of **DPPTDPP**

### DFT calculations

Calculation method: B3LYP/6-31+G\*\* for C, H, N, O, S with Gaussian 09.

### DPP-DPP

Standard orientation:

| Center<br>Number | Atomic<br>Number | Atomic<br>Type | Coordinates (Angstroms) |           |           |
|------------------|------------------|----------------|-------------------------|-----------|-----------|
|                  |                  |                | X                       | Y         | Z         |
| 1                | 6                | 0              | -7.746619               | 1.777239  | -0.578894 |
| 2                | 6                | 0              | -5.464271               | 1.287003  | -0.406245 |
| 3                | 6                | 0              | -6.176724               | 0.123068  | -0.122923 |
| 4                | 6                | 0              | -7.570656               | 0.392108  | -0.191754 |
| 5                | 6                | 0              | -6.003118               | -1.248072 | 0.311869  |
| 6                | 6                | 0              | -8.282210               | -0.730536 | 0.219753  |
| 7                | 6                | 0              | -9.709864               | -0.892729 | 0.360415  |
| 8                | 6                | 0              | -10.432736              | -1.818949 | 1.100369  |
| 9                | 16               | 0              | -10.811046              | 0.214853  | -0.453293 |
| 10               | 6                | 0              | -11.835431              | -1.653377 | 1.001969  |
| 11               | 1                | 0              | -9.974402               | -2.571332 | 1.725967  |
| 12               | 6                | 0              | -12.184542              | -0.605729 | 0.188105  |
| 13               | 1                | 0              | -12.553299              | -2.279966 | 1.517970  |
| 14               | 1                | 0              | -13.178445              | -0.257618 | -0.058303 |
| 15               | 6                | 0              | -4.041175               | 1.493119  | -0.393890 |
| 16               | 6                | 0              | -3.308314               | 2.676433  | -0.341743 |
| 17               | 16               | 0              | -2.948887               | 0.109050  | -0.407705 |
| 18               | 6                | 0              | -1.917666               | 2.480978  | -0.329426 |
| 19               | 1                | 0              | -3.759623               | 3.655597  | -0.276603 |
| 20               | 6                | 0              | -1.540940               | 1.144831  | -0.370984 |
| 21               | 1                | 0              | -1.195660               | 3.288522  | -0.281216 |
| 22               | 6                | 0              | -6.217289               | 3.621129  | -1.238484 |
| 23               | 1                | 0              | -5.271319               | 3.641837  | -1.782408 |
| 24               | 1                | 0              | -7.022816               | 3.766014  | -1.963687 |
| 25               | 6                | 0              | -7.543527               | -3.139876 | 0.801347  |
| 26               | 1                | 0              | -8.510036               | -3.440642 | 0.393511  |
| 27               | 1                | 0              | -6.765020               | -3.672875 | 0.248522  |
| 28               | 6                | 0              | -7.417336               | -3.479170 | 2.288957  |
| 29               | 1                | 0              | -7.571898               | -4.551907 | 2.444591  |
| 30               | 1                | 0              | -6.416186               | -3.222058 | 2.642999  |
| 31               | 1                | 0              | -8.145163               | -2.934039 | 2.898020  |
| 32               | 6                | 0              | -6.298903               | 4.724141  | -0.179942 |
| 33               | 1                | 0              | -7.283130               | 4.707133  | 0.294237  |
| 34               | 1                | 0              | -5.541864               | 4.603230  | 0.601170  |
| 35               | 1                | 0              | -6.159446               | 5.704837  | -0.646510 |
| 36               | 7                | 0              | -6.409375               | 2.280325  | -0.688669 |
| 37               | 7                | 0              | -7.341723               | -1.720411 | 0.516573  |
| 38               | 8                | 0              | -8.731710               | 2.462748  | -0.829678 |
| 39               | 8                | 0              | -5.021692               | -1.967736 | 0.464896  |
| 40               | 6                | 0              | 1.541009                | -1.145038 | -0.371047 |
| 41               | 16               | 0              | 2.948947                | -0.109241 | -0.407534 |
| 42               | 6                | 0              | 1.917741                | -2.481188 | -0.329673 |
| 43               | 6                | 0              | 4.041257                | -1.493310 | -0.393871 |
| 44               | 6                | 0              | 3.308391                | -2.676633 | -0.341944 |
| 45               | 1                | 0              | 1.195742                | -3.288749 | -0.281645 |
| 46               | 6                | 0              | 5.464343                | -1.287135 | -0.406216 |
| 47               | 1                | 0              | 3.759681                | -3.655815 | -0.276985 |
| 48               | 6                | 0              | 6.176722                | -0.123115 | -0.123018 |
| 49               | 7                | 0              | 6.409511                | -2.280377 | -0.688699 |
| 50               | 6                | 0              | 7.570672                | -0.392050 | -0.191921 |
| 51               | 6                | 0              | 6.003042                | 1.247981  | 0.311887  |
| 52               | 6                | 0              | 7.746730                | -1.777193 | -0.578967 |
| 53               | 6                | 0              | 6.217522                | -3.621265 | -1.238319 |
| 54               | 6                | 0              | 8.282159                | 0.730594  | 0.219694  |

|    |    |   |           |           |           |
|----|----|---|-----------|-----------|-----------|
| 55 | 7  | 0 | 7.341619  | 1.720390  | 0.516606  |
| 56 | 8  | 0 | 5.021578  | 1.967576  | 0.465001  |
| 57 | 8  | 0 | 8.731866  | -2.462675 | -0.829635 |
| 58 | 1  | 0 | 5.271654  | -3.642084 | -1.782422 |
| 59 | 1  | 0 | 7.023185  | -3.766242 | -1.963348 |
| 60 | 6  | 0 | 6.298985  | -4.724115 | -0.179591 |
| 61 | 6  | 0 | 9.709801  | 0.892869  | 0.360407  |
| 62 | 6  | 0 | 7.543353  | 3.139891  | 0.801275  |
| 63 | 1  | 0 | 7.283151  | -4.707037 | 0.294716  |
| 64 | 1  | 0 | 5.541848  | -4.603092 | 0.601408  |
| 65 | 1  | 0 | 6.159594  | -5.704884 | -0.646026 |
| 66 | 6  | 0 | 10.432561 | 1.819014  | 1.100564  |
| 67 | 16 | 0 | 10.811098 | -0.214504 | -0.453405 |
| 68 | 1  | 0 | 8.509925  | 3.440621  | 0.393567  |
| 69 | 1  | 0 | 6.764930  | 3.672847  | 0.248288  |
| 70 | 6  | 0 | 7.416950  | 3.479312  | 2.288835  |
| 71 | 6  | 0 | 11.835275 | 1.653596  | 1.002167  |
| 72 | 1  | 0 | 9.974127  | 2.571248  | 1.726273  |
| 73 | 6  | 0 | 12.184505 | 0.606135  | 0.188111  |
| 74 | 1  | 0 | 7.571458  | 4.552068  | 2.444391  |
| 75 | 1  | 0 | 6.415764  | 3.222194  | 2.642767  |
| 76 | 1  | 0 | 8.144720  | 2.934261  | 2.898040  |
| 77 | 1  | 0 | 12.553074 | 2.280172  | 1.518278  |
| 78 | 1  | 0 | 13.178447 | 0.258176  | -0.058355 |
| 79 | 6  | 0 | -0.191608 | 0.651733  | -0.368180 |
| 80 | 1  | 0 | 0.570872  | 1.429275  | -0.362024 |
| 81 | 6  | 0 | 0.191674  | -0.651948 | -0.368249 |
| 82 | 1  | 0 | -0.570804 | -1.429493 | -0.362222 |

-----  
Total Energy (HF)= -3580.018786 Hartree

## DPPTDPP

Standard orientation:

| Center<br>Number | Atomic<br>Number | Atomic<br>Type | Coordinates (Angstroms) |           |           |
|------------------|------------------|----------------|-------------------------|-----------|-----------|
|                  |                  |                | X                       | Y         | Z         |
| 1                | 6                | 0              | -7.990152               | 1.741230  | -0.625505 |
| 2                | 6                | 0              | -5.729369               | 1.157834  | -0.464801 |
| 3                | 6                | 0              | -6.486594               | 0.040429  | -0.124117 |
| 4                | 6                | 0              | -7.868494               | 0.366477  | -0.183720 |
| 5                | 6                | 0              | -6.363218               | -1.318037 | 0.363220  |
| 6                | 6                | 0              | -8.619231               | -0.708221 | 0.283528  |
| 7                | 6                | 0              | -10.050021              | -0.803740 | 0.450039  |
| 8                | 6                | 0              | -10.800880              | -1.672708 | 1.230683  |
| 9                | 16               | 0              | -11.114749              | 0.323873  | -0.384769 |
| 10               | 6                | 0              | -12.196282              | -1.449048 | 1.146513  |
| 11               | 1                | 0              | -10.366486              | -2.424247 | 1.874090  |
| 12               | 6                | 0              | -12.512040              | -0.414071 | 0.303201  |
| 13               | 1                | 0              | -12.932612              | -2.026528 | 1.692852  |
| 14               | 1                | 0              | -13.493668              | -0.031205 | 0.059104  |
| 15               | 6                | 0              | -4.296247               | 1.298918  | -0.477979 |
| 16               | 6                | 0              | -3.515095               | 2.452989  | -0.473890 |
| 17               | 16               | 0              | -3.267244               | -0.128830 | -0.459026 |
| 18               | 6                | 0              | -2.132553               | 2.208312  | -0.473430 |

|    |    |   |           |           |           |
|----|----|---|-----------|-----------|-----------|
| 19 | 1  | 0 | -3.927129 | 3.450704  | -0.435308 |
| 20 | 6  | 0 | -1.818464 | 0.854869  | -0.478567 |
| 21 | 1  | 0 | -1.375708 | 2.982752  | -0.461049 |
| 22 | 6  | 0 | -6.390546 | 3.485229  | -1.387331 |
| 23 | 1  | 0 | -5.450762 | 3.439676  | -1.940491 |
| 24 | 1  | 0 | -7.197062 | 3.632052  | -2.111036 |
| 25 | 6  | 0 | -7.971894 | -3.121834 | 0.953565  |
| 26 | 1  | 0 | -8.953018 | -3.400772 | 0.565596  |
| 27 | 1  | 0 | -7.220114 | -3.708026 | 0.417974  |
| 28 | 6  | 0 | -7.845160 | -3.402803 | 2.453241  |
| 29 | 1  | 0 | -8.041437 | -4.460811 | 2.655481  |
| 30 | 1  | 0 | -6.831005 | -3.172454 | 2.788289  |
| 31 | 1  | 0 | -8.544201 | -2.803241 | 3.044589  |
| 32 | 6  | 0 | -6.412079 | 4.637993  | -0.380205 |
| 33 | 1  | 0 | -7.391090 | 4.687901  | 0.102367  |
| 34 | 1  | 0 | -5.653427 | 4.519014  | 0.399687  |
| 35 | 1  | 0 | -6.233377 | 5.588820  | -0.892867 |
| 36 | 7  | 0 | -6.633347 | 2.180067  | -0.774879 |
| 37 | 7  | 0 | -7.716459 | -1.724919 | 0.606548  |
| 38 | 8  | 0 | -8.947764 | 2.459008  | -0.891283 |
| 39 | 8  | 0 | -5.408323 | -2.069202 | 0.529251  |
| 40 | 6  | 0 | 1.818468  | -0.854847 | -0.478573 |
| 41 | 16 | 0 | 3.267239  | 0.128869  | -0.459228 |
| 42 | 6  | 0 | 2.132569  | -2.208287 | -0.473322 |
| 43 | 6  | 0 | 4.296253  | -1.298872 | -0.478044 |
| 44 | 6  | 0 | 3.515112  | -2.452950 | -0.473803 |
| 45 | 1  | 0 | 1.375729  | -2.982730 | -0.460822 |
| 46 | 6  | 0 | 5.729376  | -1.157779 | -0.464886 |
| 47 | 1  | 0 | 3.927158  | -3.450656 | -0.435091 |
| 48 | 6  | 0 | 6.486605  | -0.040419 | -0.124079 |
| 49 | 7  | 0 | 6.633348  | -2.180019 | -0.774959 |
| 50 | 6  | 0 | 7.868501  | -0.366483 | -0.183653 |
| 51 | 6  | 0 | 6.363241  | 1.318053  | 0.363248  |
| 52 | 6  | 0 | 7.990153  | -1.741185 | -0.625600 |
| 53 | 6  | 0 | 6.390530  | -3.485167 | -1.387436 |
| 54 | 6  | 0 | 8.619248  | 0.708192  | 0.283630  |
| 55 | 7  | 0 | 7.716486  | 1.724947  | 0.606528  |
| 56 | 8  | 0 | 5.408342  | 2.069201  | 0.529337  |
| 57 | 8  | 0 | 8.947768  | -2.459023 | -0.891198 |
| 58 | 1  | 0 | 5.450785  | -3.439557 | -1.940654 |
| 59 | 1  | 0 | 7.197078  | -3.632025 | -2.111101 |
| 60 | 6  | 0 | 6.411921  | -4.637937 | -0.380317 |
| 61 | 6  | 0 | 10.050048 | 0.803666  | 0.450133  |
| 62 | 6  | 0 | 7.971923  | 3.121887  | 0.953440  |
| 63 | 1  | 0 | 7.390871  | -4.687866 | 0.102376  |
| 64 | 1  | 0 | 5.653170  | -4.518947 | 0.399478  |
| 65 | 1  | 0 | 6.233261  | -5.588756 | -0.893009 |
| 66 | 6  | 0 | 10.800966 | 1.672593  | 1.230767  |
| 67 | 16 | 0 | 11.114706 | -0.324017 | -0.384662 |
| 68 | 1  | 0 | 8.953059  | 3.400793  | 0.565482  |
| 69 | 1  | 0 | 7.220165  | 3.708029  | 0.417766  |
| 70 | 6  | 0 | 7.845116  | 3.402983  | 2.453086  |
| 71 | 6  | 0 | 12.196358 | 1.448877  | 1.146554  |
| 72 | 1  | 0 | 10.366629 | 2.424160  | 1.874177  |
| 73 | 6  | 0 | 12.512055 | 0.413952  | 0.303158  |
| 74 | 1  | 0 | 8.041404  | 4.461003  | 2.655247  |
| 75 | 1  | 0 | 6.830938  | 3.172686  | 2.788101  |
| 76 | 1  | 0 | 8.544113  | 2.803460  | 3.044524  |

|    |   |   |           |           |           |
|----|---|---|-----------|-----------|-----------|
| 77 | 1 | 0 | 12.932728 | 2.026337  | 1.692862  |
| 78 | 1 | 0 | 13.493663 | 0.031090  | 0.058973  |
| 79 | 6 | 0 | -0.548971 | 0.267499  | -0.478219 |
| 80 | 6 | 0 | 0.548970  | -0.267488 | -0.478221 |

-----  
Total Energy (HF)= -3578.7625601Hartree
